# Supplementary material
Source: publisher figshare collection journal article supplement (https://acs.figshare.com/ndownloader/files/4438399)
Supplement: Supplementary file 1 [file 4438399]

## **Supporting Information**

### **C<sub>12</sub>mimBr Ionic liquid/SDS vesicle formation and use as template for the synthesis of hollow silica spheres**

Jie Yuan, Xiangtao Bai, Mingwei Zhao, Liqiang Zheng\*

*Key Laboratory of Colloid and Interface Chemistry, Shandong University, Ministry of  
Education, Jinan, Shandong, 250100, People's Republic of China*

E-mail: lqzheng@sdu.edu.cn Phone: +86-531-88366062 Fax: +86-531-88564750

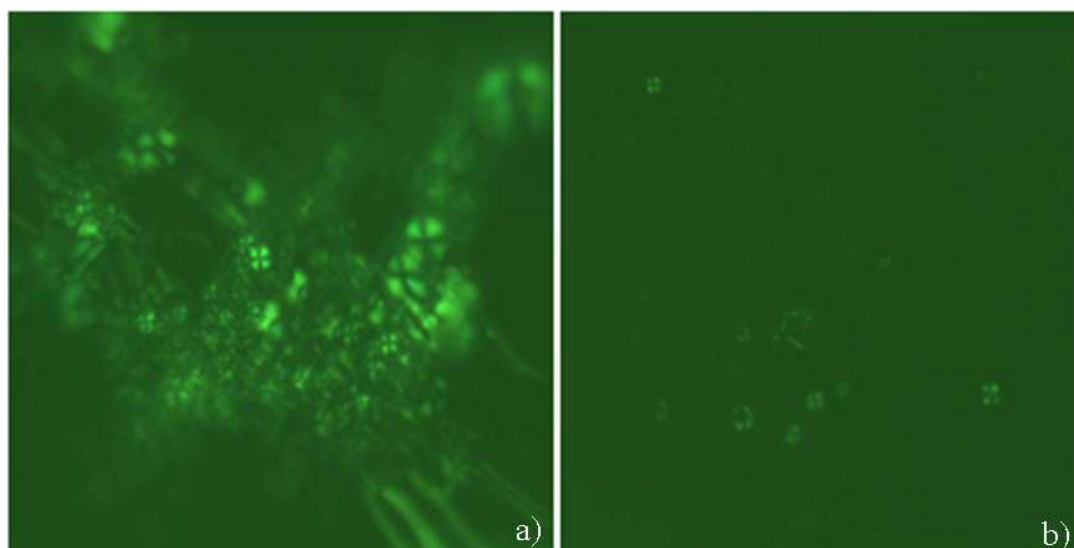

**Figure S1.** Typical polarized images of the samples from the  $L_\alpha$  phase:  
(a) 100 mM  $C_{12}mimBr$  and  $r = 0.6$ ; (b) 100 mM  $C_{12}mimBr$  and  $r = 0.63$  at  $25.0 (\pm 0.1) ^\circ C$ .

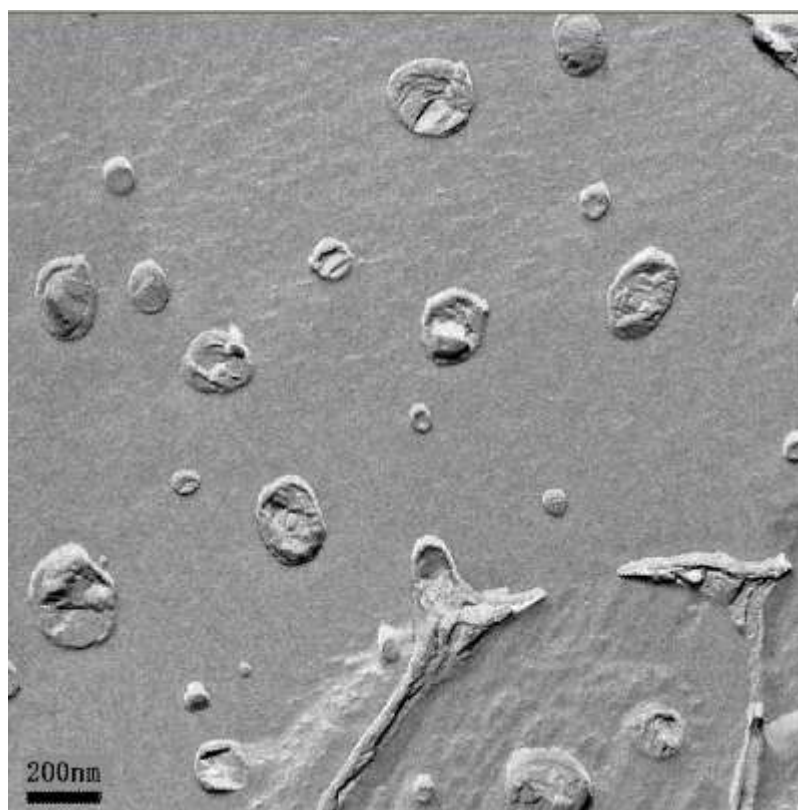

**Figure S2.** FF-TEM images of 100 mM  $C_{12}mimBr$  and  $r = 0.63$  birefringent samples from the  $L_\alpha$  phase.

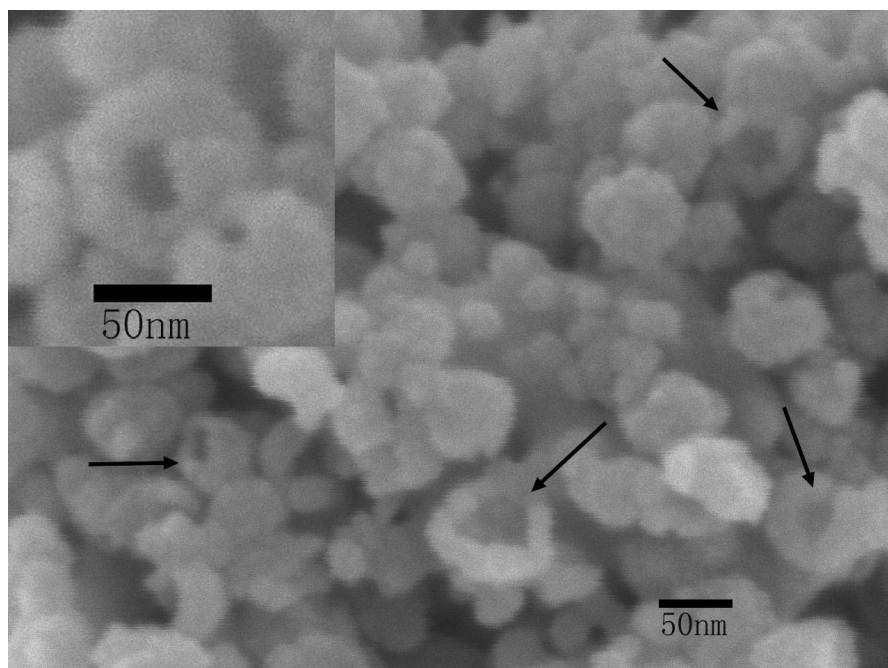

**Figure S3.** SEM images of calcined hollow silica spheres prepared at  $25.0 (\pm 0.1) ^\circ\text{C}$ . The black arrows indicate examples of broken spheres. Inset: An individual sphere with hollow interior.
